# Supplementary material
Source: Royal Society of Chemistry journal article supplement (doi:10.1039/d6nj01514j)
Supplement: d6nj01514j1.pdf [file d6nj01514j1.pdf]

**Supplementary material**

**Phytochemical Profiling and Wound Healing Properties of Essential Oil Isolated from  
*Rosmarinus officinalis* Aerial Parts: GC/MS Analysis and *In-Vitro* Studies**

**A**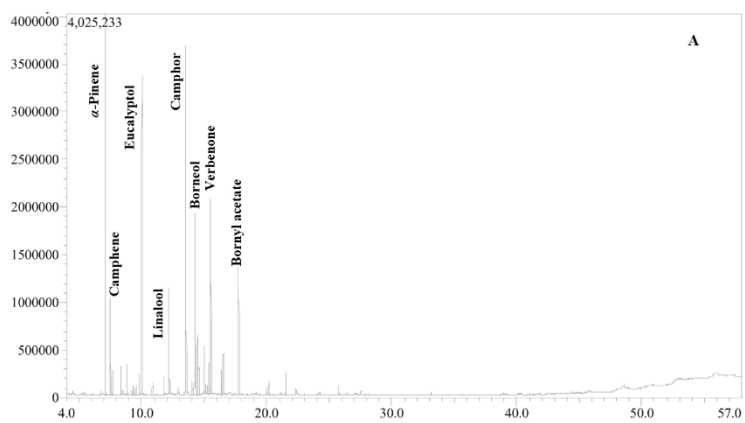**B**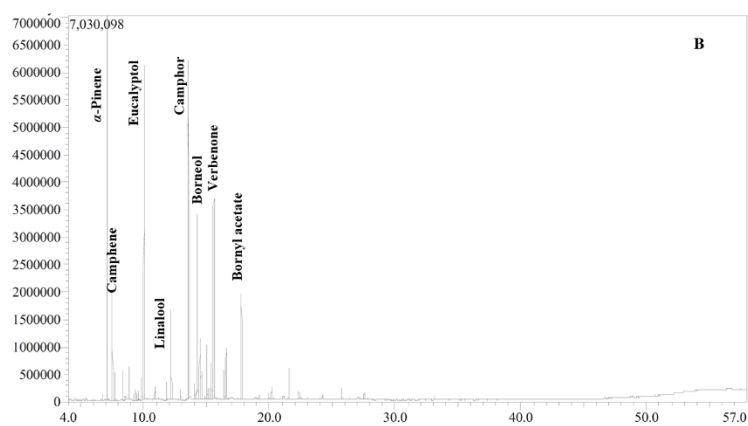**C**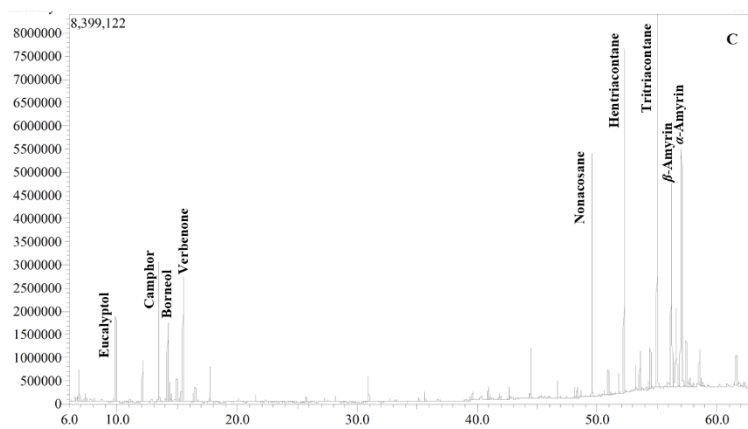**D**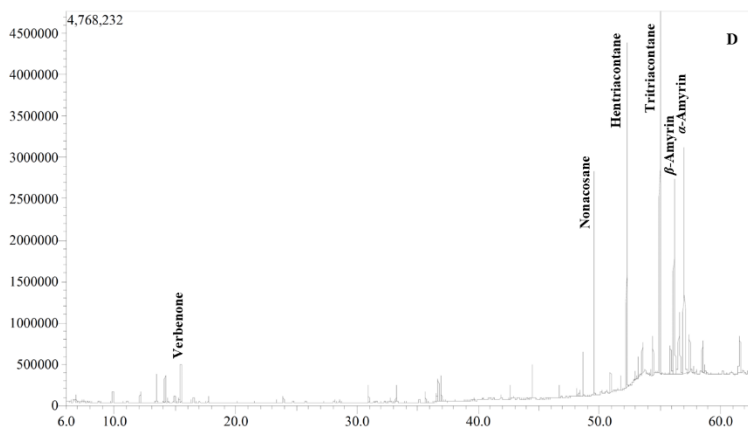

**Figure S1.** GC chromatogram of FRHD (A), DRHD (B), FRSE (C), DRSE (D). FRHD: Fresh rosemary hydro-distillation; DRHD: Dried rosemary hydro-distillation; FRSE: Fresh rosemary solvent extraction; DRSE: Dried rosemary solvent extraction.
